# Supplementary material for: Aquatic environmental DNA detects seasonal fish abundance and habitat preference in an urban estuary
Source: PLoS One. 2017 Apr 12;12(4):e0175186. doi: 10.1371/journal.pone.0175186 (PMC5389620; doi:10.1371/journal.pone.0175186)
Supplement: S9 Table — (XLSX) [file pone.0175186.s009.xlsx]

## Sheet: S9 Table. DNA extraction
S9 Table. Modified PowerSoil protocol for DNA extraction from filter.
1. Using a single-edge razor and plastic petri dish as a cutting surface, first trim filter, discarding the outer “unused” portion that was not exposed to the filtrate (this makes it easier to fit filter into 1 PowerBead tube. Then cut filter into pieces approximately 2-3 mm x 10 mm, using single-edge razor and plastic petri dish as a cutting surface. Use forceps (or the 15 mL tube the filter was…
2. Add 180 µl C1 solution.
3. Place on vortexer platform on high for 10 min. Watch that device does not fall off bench.
4. Centrifuge at 10,000g for 1 min.
5. Transfer ~465 µl supernatant to a 2 ml Collection Tube (1 Collection Tube per PowerBead Tube). We use a P200 set at 155 µl, and transfer 3 aliquots of supernatant from each PowerBead tube. You can stick pipette tip down deeply along the tube wall, beads and paper fragments are too large to go into pipette.
6. Add 100 μl of Solution C2 and 100 μl of Solution C3. Vortex 10 seconds.
7. Incubate at 4°C for 5 min (put rack in refrigerator/cold room).
8. Centrifuge at room temp 1 min at 10,000g.
9. Transfer 625 μl supernatant to a new 2 ml Collection Tube.
10. Shake Solution C4 before use. Add 1 ml Solution C4 to the supernatant. Invert 20 times to mix.
11. Load 675 μl onto a Spin Filter and centrifuge at 10,000g for 1 min at room temp.
-Discard flow through.
-Add another 675 μl to Spin Filter and centrifuge at 10,000g for 1 min.
-Discard flow through.
-Load the remaining supernatant onto Spin Filter and centrifuge at 10,000g for 1 min.
-Discard flow through.
12. Add 500 μl Solution C5 to Spin Filter and centrifuge at room temp for 30 secs at 10,000g. Discard flow through.
13. Centrifuge at room temp for 1 min at 10,000g.
14. Place Spin Filter in a clean 2 ml Collection Tube.
15. Add 50 μl Solution C6 to the center of the white filter (don’t touch filter with pipette tip).
16. Centrifuge at room temp for 30 secs at 10,000g. Usually recover ~45 μl (compare to 50 μl C6 input). Store at -20C.
